# Supplementary material for: Gas entrapment and microbial N2O reduction reduce N2O emissions from a biochar-amended sandy clay loam soil
Source: PubMed Central journal article supplement (PMC5180216; doi:10.1038/srep39574), 2016-12-23
Supplement: srep39574-s1.pdf [file srep39574-s1.pdf]

# Gas entrapment and microbial N<sub>2</sub>O reduction reduce N<sub>2</sub>O emissions from a biochar-amended sandy clay loam soil

Johannes Harter <sup>a</sup>, Ivan Guzman-Bustamante <sup>b</sup>, Stefanie Kuehfuss <sup>c</sup>, Reiner Ruser <sup>b</sup>,  
Reinhard Well <sup>d</sup>, Oliver Spott <sup>e</sup>, Andreas Kappler <sup>a</sup> and Sebastian Behrens <sup>a,f,g\*</sup>

<sup>a</sup> Geomicrobiology & Microbial Ecology, Center for Applied Geosciences, University of Tuebingen, Tuebingen, Germany

<sup>b</sup> Fertilization and Soil Matter Dynamics, Institute of Crop Science, University of Hohenheim, Stuttgart, Germany

<sup>c</sup> Plant Ecology and Ecotoxicology, Institute of Landscape and Plant Ecology, University of Hohenheim, Stuttgart, Germany

<sup>d</sup> Institute of Climate-Smart Agriculture, Johann Heinrich von Thünen-Institut, Federal Research Institute for Rural Areas,  
Forestry and Fisheries, Braunschweig, Germany

<sup>e</sup> Department of Soil Physics, Helmholtz Centre for Environmental Research – UFZ, Halle/Saale, Germany

<sup>f</sup> Department of Civil, Environmental, and Geo-Engineering, University of Minnesota, Minneapolis, MN, USA

<sup>g</sup> BioTechnology Institute, University of Minnesota, St. Paul, MN, USA

## Supplementary Information

\* Corresponding author. Tel.: +1-612-626-8225 and +1-612-624-8454.

*E-mail address:* [sbehrens@umn.edu](mailto:sbehrens@umn.edu) (S. Behrens).

# 1. Material and Methods

## 1.1 Soil characterization methods

Soil pH was determined in a 1:5 water suspension according to ISO 10390. Soil particle size distribution was determined according to ISO 11277 by sieving and sedimentation using different sieves and a Sedigraph III (Micromeritics, Norcross, GA, USA). CaCO<sub>3</sub> content was determined using a Calcimeter (Eijkelkamp, Giesbeek, The Netherlands) according to ISO 10693. Carbon and nitrogen were quantified according to ISO 10694 and 13878 using a Vario EL elemental analyser (Elementar, Hanau, Germany). For the quantification of the other elements listed in table 1 soil samples were digested prior to analysis. Samples were acid digested by microwave pressure digestion using a MLS Start 1500 microwave (MLS, Leutkirch, Germany) according to the manufacturer recommendations for soil. The resulting solution was analysed by Inductively Coupled Plasma Optical Emission Spectroscopy (ICP-OES) with an Optima 5300 DV (PerkinElmer, Waltham, MA, USA).

## 1.2 Gross nitrification and NO<sub>3</sub><sup>-</sup> consumption rates

Gross nitrification and NO<sub>3</sub><sup>-</sup> consumption rates were determined using the equations (1 - 2) provided by Davidson et al. 1991.

$$N = \frac{M_0 - M_1}{t} \times \frac{\log(H_0 M_1 / H_1 M_0)}{\log(M_0 / M_1)} \quad (1)$$

$$C = \frac{M_0 - M_1}{t} \times \frac{\log(H_0 / H_1)}{\log(M_0 / M_1)} \quad (2)$$

$N$  : nitrification rate (mg N kg<sup>-1</sup> dry soil d<sup>-1</sup>)

$C$  : NO<sub>3</sub><sup>-</sup> consumption rate (mg N kg<sup>-1</sup> dry soil d<sup>-1</sup>)

$M_0$  : <sup>14+15</sup>NO<sub>3</sub><sup>-</sup> pool at first time point (mg NO<sub>3</sub><sup>-</sup>-N kg<sup>-1</sup> dry soil)

$M_1$  : <sup>14+15</sup>NO<sub>3</sub><sup>-</sup> pool at second time point (mg NO<sub>3</sub><sup>-</sup>-N kg<sup>-1</sup> dry soil)

$H_0$  : <sup>15</sup>NO<sub>3</sub><sup>-</sup> pool at first time point (mg NO<sub>3</sub><sup>-</sup>-N kg<sup>-1</sup> dry soil)

$H_1$  : <sup>15</sup>NO<sub>3</sub><sup>-</sup> pool at second time point (mg NO<sub>3</sub><sup>-</sup>-N kg<sup>-1</sup> dry soil)

$t$  : time between first and second time point (days)

## 1.3 Quantitative polymerase chain reaction (qPCR) analyses

### 1.3.1 Nucleic acid extraction efficiencies

Nucleic acid extraction efficiencies were calculated based on the internal RNA and DNA standards using equation (3).

$$\text{Extraction efficiency} = \frac{\text{internal standard copies quantified in the final DNA or cDNA extract}}{\text{DNA or RNA internal standard copies added prior to extraction}} \quad (3)$$

### 1.3.2 Quantitative polymerase chain reaction (qPCR)

Details about the used primers, reactions mixtures, thermal profiles and qPCR efficiencies are listed in table S1 and S2.

Table S1: Primers used for qPCRs.

| target gene          | primer name | primer sequence (5' - 3')  | fragment size (bp) | reference                         |
|----------------------|-------------|----------------------------|--------------------|-----------------------------------|
| <i>napA</i>          | V17m        | TGGACVATGGGYTTYAAYC        | 152                | Bru et al. (2007)                 |
|                      | napA4r      | ACYTCRCGHGCVGTRCCRCA       |                    |                                   |
| <i>narG</i>          | narG-f      | TCGCCSATYCCGGCSATGTC       | 173                | Bru et al. (2007)                 |
|                      | narG-r      | GAGTTGTACCAGTCRGC SGAYTCSG |                    |                                   |
| <i>nirK</i>          | nirK876c    | ATYGGCGVCAYGGCGA           | 164                | Henry et al. (2004)<br>(modified) |
|                      | nirK1040    | GCCTCGATCAGRTRTGGTT        |                    |                                   |
| <i>nirS</i>          | nirSCd3aF   | AACGYSAAGGARACSGG          | 407                | Kandeler et al. (2006)            |
|                      | nirSR3cd    | GASTTCGGRTGSGTCTTSAYGAA    |                    |                                   |
| typical <i>nosZ</i>  | nosZ2F      | CGCRACGGCAASAAGGTSMSST     | 267                | Henry et al. (2006)               |
|                      | nosZ2R      | CAKRTGCAKSGCRTGGCAGAA      |                    |                                   |
| atypical <i>nosZ</i> | nosZ-II-F   | CTNGGNCCNYTKAYAC           | 698                | Jones et al. (2013)               |
|                      | nosZ-II-R   | GCNGARCARAANTCBGTRC        |                    |                                   |
| Internal standard    | APA9F       | CGAACCTGGACTGTTATGATG      | 87                 | Thonar et al. (2012)              |
|                      | APA9R       | AATAACAATCCCCTGTATTTAC     |                    |                                   |

nirK876c was modified from nirK876 (Henry et al., 2004) to increase binding specificity

Table S2: Details about the qPCR assays performed with DNA and cDNA extracts.

| target gene            | origin of standard                                     | reaction mixture                                                                                    | volume ( $\mu$ l)         | thermal profile                                                         | Efficiency [%] |
|------------------------|--------------------------------------------------------|-----------------------------------------------------------------------------------------------------|---------------------------|-------------------------------------------------------------------------|----------------|
| <i>napA</i>            | <i>Pseudomonas aeruginosa</i> PAO1                     | SsoAdvanced Universal SYBR<br>V17m (5 $\mu$ M)<br>napA4r (5 $\mu$ M)<br>PCR water<br>Template       | 5<br>0.5<br>0.5<br>3<br>1 | 98°C – 15 s<br>55°C – 15 s<br>72°C – 15 s<br>X 45 cycles                | 74             |
| <i>narG</i>            | <i>Pseudomonas aeruginosa</i> PAO1                     | SsoAdvanced Universal SYBR<br>narG-f (5 $\mu$ M)<br>narG-r (5 $\mu$ M)<br>PCR water<br>Template     | 5<br>0.5<br>0.5<br>3<br>1 | 98°C – 10 s<br>62°C – 20 s<br>X 40 cycles                               | 84             |
| <i>nirK</i>            | <i>Ensifer meliloti</i> 1021                           | SsoAdvanced Universal SYBR<br>nirK876c (5 $\mu$ M)<br>nirK1040 (5 $\mu$ M)<br>PCR water<br>Template | 5<br>0.5<br>0.5<br>3<br>1 | 98°C – 10 s<br>58°C – 20 s<br>X 40 cycles                               | 92             |
| <i>nirS</i>            | <i>Ralstonia eutropha</i> H16                          | SsoAdvanced Universal SYBR<br>nirSCd3aF (5 $\mu$ M)<br>nirSRcd (5 $\mu$ M)<br>PCR water<br>Template | 5<br>1<br>1<br>2<br>1     | 98°C – 30 s<br>57°C – 30 s<br>72°C - 30 s<br>X 40 cycles                | 89             |
| typical<br><i>nosZ</i> | <i>Ensifer meliloti</i> 1021                           | SsoAdvanced Universal SYBR<br>nosZ2F (5 $\mu$ M)<br>nosZ2R (5 $\mu$ M)<br>PCR water<br>Template     | 5<br>0.5<br>0.5<br>3<br>1 | 98°C – 15 s<br>60°C – 25 s<br>X 40 cycles                               | 74             |
| atypical <i>nosZ</i>   | <i>Gemmatimonas aurantiaca</i> T-27                    | IQ SYBR<br>nosZ-II-F (5 $\mu$ M)<br>nosZ-II-R (5 $\mu$ M)<br>PCR water<br>Template                  | 5<br>2<br>2<br>0<br>1     | 98°C – 30 s<br>54°C – 30 s<br>72°C - 45 s<br>80°C – 30 s<br>X 40 cycles | 86             |
| Internal<br>standard   | <i>African cassava mosaic virus</i> -<br>[Nigeria-Ogo] | SsoAdvanced Universal SYBR<br>APA9F (5 $\mu$ M)<br>APA9R (5 $\mu$ M)<br>PCR water<br>Template       | 5<br>0.5<br>0.5<br>3<br>1 | 98°C – 10 s<br>50°C – 15 s<br>X 35 cycles                               | 89             |

## 1.4 N<sub>2</sub>O source partitioning and rates of NO<sub>3</sub><sup>-</sup>-derived N<sub>2</sub>O and N<sub>2</sub>

### 1.4.1 Fractions of NO<sub>3</sub><sup>-</sup>-derived N<sub>2</sub>O and N<sub>2</sub>

For each gas sample collected in experiment 1, 2, and 3, the fraction of N<sub>2</sub> and/or N<sub>2</sub>O evolving from the <sup>15</sup>N-labeled NO<sub>3</sub><sup>-</sup> pool ( $f_p$ ), was calculated using the equations provided by (Spott et al., 2006).

$$f_p = \frac{a_m - a_{bgd}}{a_p - a_{bgd}} \quad (4)$$

$a_{bgd}$ : <sup>15</sup>N abundance of atmospheric background

$a_m$ : measured <sup>15</sup>N abundance of N<sub>2</sub> and N<sub>2</sub>O

$$a_m = \frac{{}^{29}R + 2 \times {}^{30}R}{2(1 + {}^{29}R + {}^{30}R)} \quad (5)$$

$a_p$ : calculated <sup>15</sup>N abundance of active <sup>15</sup>N-labeled NO<sub>3</sub><sup>-</sup> pool

$$a_p = \frac{{}^{30}X_m - a_{bgd} \times a_m}{a_m - a_{bgd}} \quad (6)$$

${}^{30}X_m$ : measured fraction of  $m/z$  30 in N<sub>2</sub> and converted N<sub>2</sub>O

$${}^{30}X_m = \frac{{}^{30}R}{1 + {}^{29}R + {}^{30}R} \quad (7)$$

In experiment 1, nitrogen isotope ratios of N<sub>2</sub>O were determined by analysis of intact N<sub>2</sub>O molecules ( ${}^{45}R = ({}^{14}N^{15}N^{16}O + {}^{15}N^{14}N^{16}O + {}^{14}N^{14}N^{17}O)/{}^{14}N^{14}N^{16}O$ ;  ${}^{46}R = ({}^{15}N^{15}N^{16}O + {}^{14}N^{14}N^{18}O)/{}^{14}N^{14}N^{16}O$ ). To use the previous equations, isotope ratios ( ${}^{45}R$  and  ${}^{46}R$ ) were oxygen-corrected according to (Bergsma et al., 2001) using equations (8) and (9).

$${}^{29}R = {}^{45}R - {}^{17}R \quad (8)$$

$${}^{30}R = {}^{46}R - {}^{29}R \times {}^{17}R - {}^{18}R \quad (9)$$

For  ${}^{17}R$  and  ${}^{18}R$  we used the values suggested by (Bergsma et al., 2001):

$${}^{17}R = 0.000373, {}^{18}R = 0.0020052$$

#### 1.4.2 Rates of NO<sub>3</sub><sup>-</sup>-derived N<sub>2</sub>O and N<sub>2</sub>

Concentrations of NO<sub>3</sub><sup>-</sup>-derived N<sub>2</sub>O and N<sub>2</sub> ( $c_p$ ) in ppm were calculated according to equation (10):

$$c_p = f_p \times c_H \quad (10)$$

$c_H$ : headspace concentration (ppm) of total N<sub>2</sub>O (GC-ECD, experiment 1) or total N<sub>2</sub> (N<sub>2</sub> concentration of artificial gas mixture = 20 000 ppm, assuming a negligible relative increase in N<sub>2</sub> concentration due to microbial N<sub>2</sub> production, experiment 2 and 3).

In experiment 2 and 3, N<sub>2</sub>O and N<sub>2</sub> in the headspace was diluted during each sampling occasion due to gas exchange between the headspace and the sample vial initially filled with the artificial gas mixture. Diluted NO<sub>3</sub><sup>-</sup>-derived N<sub>2</sub>O and N<sub>2</sub> concentrations were corrected using equations (11), (12), and (13). No dilution correction was needed for experiment 1 due to the different sampling strategy.

$$cc_{p1} = c_{p1} \times \left(1 + \frac{V_{S1}}{V_{T1}}\right) \quad (11)$$

$$cc_{p3} = c_{p3} \times \left(1 + \frac{V_{S1}}{V_{T1}}\right) \times \left(1 + \frac{V_{S3}}{V_{T3}}\right) \quad (12)$$

$$cc_{ps} = c_{ps} \times \left(1 + \frac{V_{S1}}{V_{T1}}\right) \times \left(1 + \frac{V_{S3}}{V_{T3}}\right) \times \left(1 + \frac{V_{Ss}}{V_{Ts}}\right) \quad (13)$$

$cc_{p1,3,s}$ : corrected NO<sub>3</sub><sup>-</sup>-derived N<sub>2</sub>O and N<sub>2</sub> concentrations (ppm) in samples collected after 1 h of enrichment ( $cc_{p1}$ ), 3 h of enrichment ( $cc_{p3}$ ), and after shaking ( $cc_{ps}$ )

$c_{p1,3,s}$ : NO<sub>3</sub><sup>-</sup>-derived N<sub>2</sub>O and N<sub>2</sub> concentrations (ppm) in samples collected after 1 h of enrichment ( $c_{p1}$ ), 3 h of enrichment ( $c_{p3}$ ), and after shaking ( $c_{ps}$ )

$V_{S1,3,s}$ : volume of the gas samples during sampling after 1 h of enrichment ( $V_{S1}$ ), 3 h of enrichment ( $V_{S3}$ ), and after shaking ( $V_{Ss}$ )

$V_{T1,3,s}$ : total volume (headspace and gas sample) during sampling after 1 h of enrichment ( $V_{T1}$ ), 3 h of enrichment ( $V_{T3}$ ), and after shaking ( $V_{Ts}$ )

In experiment 1, NO<sub>3</sub><sup>-</sup>-derived N<sub>2</sub>O emission rates ( $ER_p$ ) were calculated according to equation (14).

As the concentration of NO<sub>3</sub><sup>-</sup>-derived N<sub>2</sub>O after 0 h of enrichment was 0, only values determined from samples collected after 1 h ( $c_{p1}$ ) were considered for emission rate calculation. For the determination of NO<sub>3</sub><sup>-</sup>-derived N<sub>2</sub>O and N<sub>2</sub> emission rates in experiment 2 and 3 equation (15) was used.

$$ER_p = c_{p1} \times \frac{k \times V_H}{m} \quad (14)$$

$$ER_p = \frac{(cc_{p3} - cc_{p1})}{t} \times \frac{k \times V_H}{m} \quad (15)$$

$ER_p$  : emission rates of  $\text{NO}_3^-$ -derived  $\text{N}_2\text{O}$  and  $\text{N}_2$  ( $\text{mg N}_2\text{O-N kg}^{-1}$  dry soil  $\text{h}^{-1}$ )

$t$  : time (h) between first (after 1 h) and second sampling (after 3 h)

$k$  : unit conversion factor calculated as  $k = \frac{\text{molar mass of N in N}_2\text{O and N}_2}{\text{molar volume of gas (20}^\circ\text{C)}} = \frac{28.014}{24.055}$

$V_H$  : volume of the headspace during sampling (equal after 1 h and 3 h of enrichment)

$m$  : mass of dry soil (g) in the gas enrichment container

The  $\text{NO}_3^-$ -derived  $\text{N}_2\text{O}$  and  $\text{N}_2$  soil entrapment/emission ratio ( $SE_p / E_p$ ), defined as the concentration (ppm) of  $\text{NO}_3^-$ -derived  $\text{N}_2\text{O}$  and  $\text{N}_2$  accumulating in the headspace before and after shaking at day 2 in experiment 3 was calculated using equation (16)

$$SE_p / E_p = \frac{cc_{ps,d2} - cc_{p3,d2}}{cc_{p3,d2}} \quad (16)$$

$cc_{p3,d2,s,d2}$  : corrected  $\text{NO}_3^-$ -derived  $\text{N}_2\text{O}$  and  $\text{N}_2$  concentrations (ppm) in samples collected after 3 h of enrichment ( $cc_{p3,d2}$ ), and after shaking ( $cc_{ps,d2}$ ) at day 2

$\text{NO}_3^-$ -derived  $\text{N}_2\text{O}$  and  $\text{N}_2$  soil entrapment ( $SER_p$ ) and total production ( $TPR_p$ ) rates were calculated from samples collected during experiment 3 after 2 days of incubation using equations (17) and (18), respectively.

$$SER_p = ER_{p,d2} \times SE_p / E_p \quad (17)$$

$$TPR_p = ER_{p,d2} + SER_p \quad (18)$$

$SER_p$  : soil entrapment rates of  $\text{NO}_3^-$ -derived  $\text{N}_2\text{O}$  and  $\text{N}_2$  ( $\text{mg N}_2\text{O-N kg}^{-1}$  dry soil  $\text{h}^{-1}$ ) at day 2

$ER_{p,d2}$  : emission rates of  $\text{NO}_3^-$ -derived  $\text{N}_2\text{O}$  and  $\text{N}_2$  ( $\text{mg N}_2\text{O-N kg}^{-1}$  dry soil  $\text{h}^{-1}$ ) at day 2

$TPR_p$  : total production rates of  $\text{NO}_3^-$ -derived  $\text{N}_2\text{O}$  and  $\text{N}_2$  ( $\text{mg N}_2\text{O-N kg}^{-1}$  dry soil  $\text{h}^{-1}$ ) at day 2

### 1.4.3 N<sub>2</sub>O source partitioning

The contribution of NO<sub>3</sub><sup>-</sup>-derived N<sub>2</sub>O to total soil-derived N<sub>2</sub>O emissions ( $f_{nitrate}$ ) was calculated from samples collected during experiment 1 using equation (19).

$$f_{nitrate} = \frac{f_p}{f_{soil}} \quad (19)$$

$f_{nitrate}$ : fraction of NO<sub>3</sub><sup>-</sup>-derived N<sub>2</sub>O of total soil-derived N<sub>2</sub>O

$f_p$ : fraction of N<sub>2</sub>O evolving from the <sup>15</sup>N-labeled NO<sub>3</sub><sup>-</sup> pool

$f_{soil}$ : fraction of N<sub>2</sub>O evolving from soil calculated as:  $f_{soil} = \frac{total\ N_2O - background\ N_2O}{total\ N_2O}$

## 2. Results

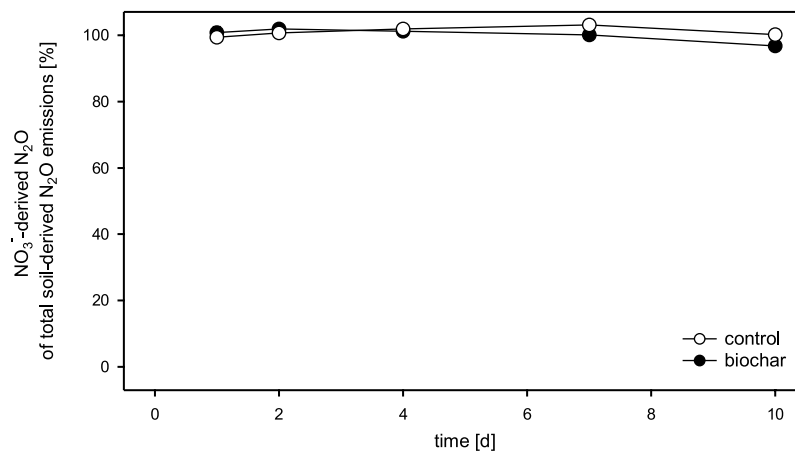

Figure S1: Contribution of NO<sub>3</sub><sup>-</sup>-derived N<sub>2</sub>O to total soil-derived N<sub>2</sub>O emissions in control (open circles) and biochar (solid circles) over time.



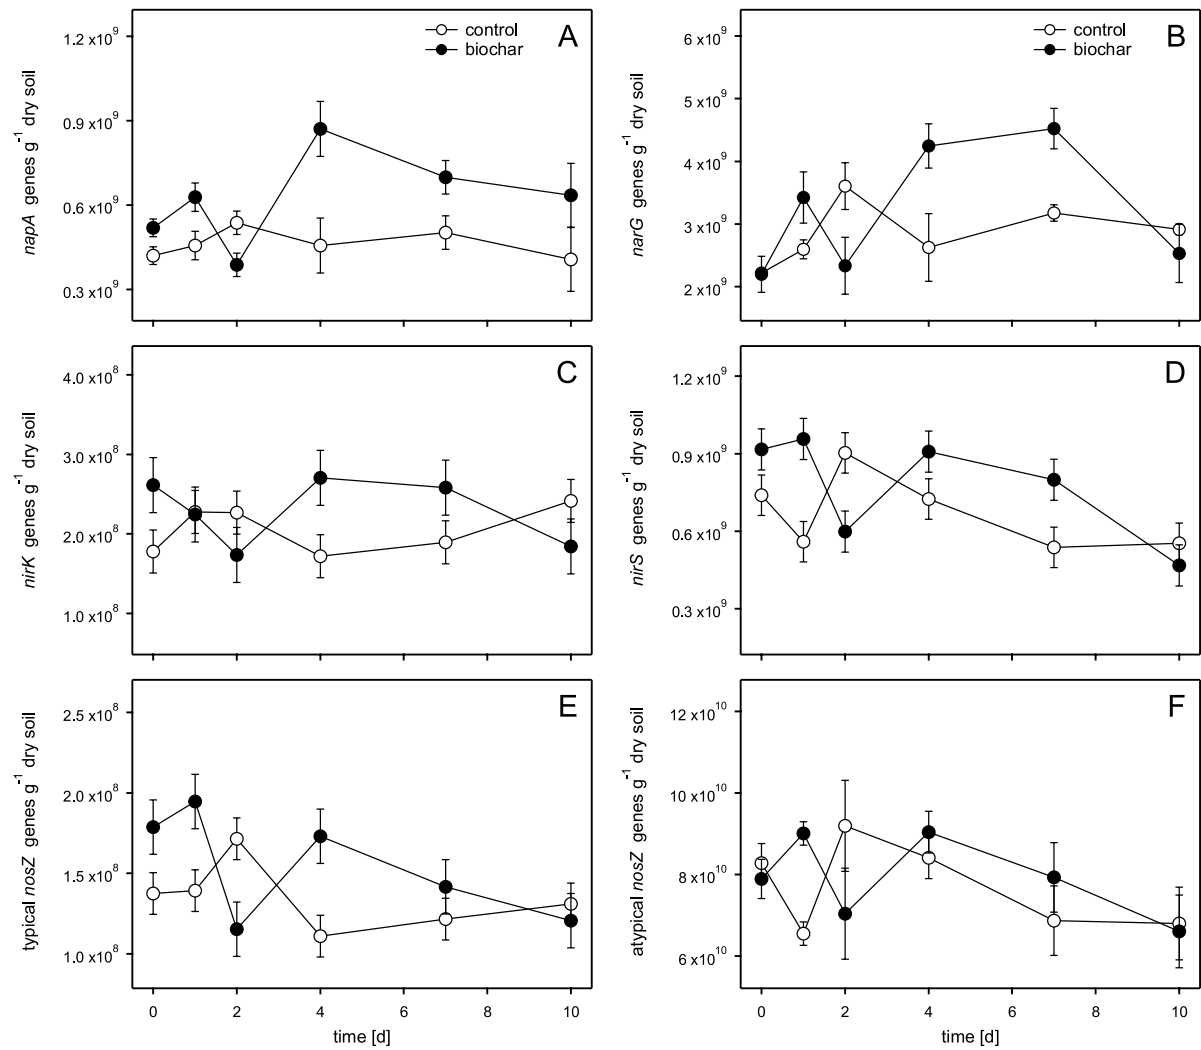

Figure S2: Gene copy numbers of functional marker genes of denitrification in control (open circles) and biochar (solid circles) microcosms over time. The different panels show: (A) *napA* (B) *narG*, (C) *nirK*, (D) *nirS*, (E) typical *nosZ*, and (F) atypical *nosZ*. Data points and error bars represent means and standard errors (n=3), respectively.

Table S3: Results from two-way ANOVAs for the gene data. The table shows F-statistics and p-values for the main effects “biochar” and “time” and their interaction “biochar\*time”.

| parameter                  | biochar |              | time |              | biochar * time |              |
|----------------------------|---------|--------------|------|--------------|----------------|--------------|
|                            | F       | p            | F    | p            | F              | p            |
| <i>napA</i> genes          | 7.18    | <b>0.026</b> | 2.21 | 0.154        | 2.98           | 0.084        |
| <i>narG</i> genes          | 0.82    | 0.387        | 5.49 | 0.065        | 2.06           | 0.256        |
| <i>nirK</i> genes          | 0.95    | 0.340        | 0.16 | 0.975        | 2.23           | 0.086        |
| <i>nirS</i> genes          | 3.02    | 0.096        | 3.36 | <b>0.020</b> | 3.73           | <b>0.013</b> |
| typical <i>nosZ</i> genes  | 2.96    | 0.099        | 1.73 | 0.169        | 3.93           | <b>0.010</b> |
| atypical <i>nosZ</i> genes | 0.07    | 0.799        | 1.76 | 0.232        | 3.02           | 0.084        |

## References

- Bergsma, T.T., Ostrom, N.E., Emmons, M., and Robertson, G.P. (2001) Measuring simultaneous fluxes from soil of N<sub>2</sub>O and N<sub>2</sub> in the field using the <sup>15</sup>N-gas “nonequilibrium” technique. *Environmental Science & Technology* **35**: 4307-4312.
- Bru, D., Sarr, A., and Philippot, L. (2007) Relative abundances of proteobacterial membrane-bound and periplasmic nitrate reductases in selected environments. *Applied and Environmental Microbiology* **73**: 5971-5974.
- Henry, S., Bru, D., Stres, B., Hallet, S., and Philippot, L. (2006) Quantitative detection of the *nosZ* gene, encoding nitrous oxide reductase, and comparison of the abundances of 16S rRNA, *narG*, *nirK*, and *nosZ* genes in soils. *Applied and Environmental Microbiology* **72**: 5181-5189.
- Henry, S., Baudoin, E., Lopez-Gutierrez, J.C., Martin-Laurent, F., Baumann, A., and Philippot, L. (2004) Quantification of denitrifying bacteria in soils by *nirK* gene targeted real-time PCR. *Journal of Microbiological Methods* **59**: 327-335.
- Jones, C.M., Graf, D.R., Bru, D., Philippot, L., and Hallin, S. (2013) The unaccounted yet abundant nitrous oxide-reducing microbial community: a potential nitrous oxide sink. *Isme Journal* **7**: 417-426.
- Kandeler, E., Deiglmayr, K., Tschierko, D., Bru, D., and Philippot, L. (2006) Abundance of *narG*, *nirS*, *nirK*, and *nosZ* genes of denitrifying bacteria during primary successions of a glacier foreland. *Applied and Environmental Microbiology* **72**: 5957-5962.
- Spott, O., Russow, R., Apelt, B., and Stange, C.F. (2006) A <sup>15</sup>N-aided artificial atmosphere gas flow technique for online determination of soil N<sub>2</sub> release using the zeolite Kostrolith SX6. *Rapid Communications in Mass Spectrometry* **20**: 3267-3274.
- Thonar, C., Erb, A., and Jansa, J. (2012) Real-time PCR to quantify composition of arbuscular mycorrhizal fungal communities--marker design, verification, calibration and field validation. *Molecular Ecology Resources* **12**: 219-232.
